# Supplementary material for: Neonatal Fc receptor for IgG regulates mucosal immune responses to luminal bacteria
Source: JCI journal article supplement (doi:10.1172/jci27821), 2006-07-14
Supplement: sd1 [file 1]

Supplementary Figure 1, Yoshida et. al.

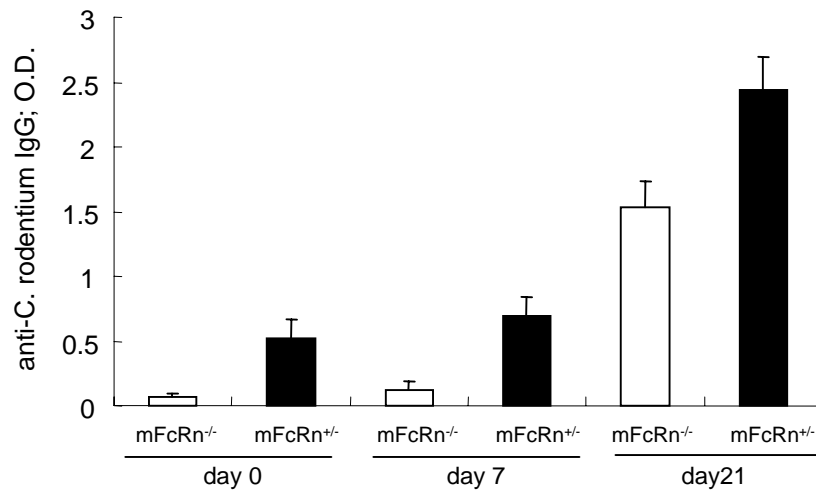

## Supplementary Figure 1

Serum anti-*C. rodentium* IgG levels at 0, 7, and 21 days after *C. rodentium* infection measured by ELISA. *C. rodentium* antigen for the detection of IgG was prepared by using the supernatant of bacteria dissolved with TNE buffer including NP-40, EDTA, protease inhibitor. The mean  $\pm$  S.D. are shown for each group (n=4).
